# Supplementary material for: Surface enhanced Raman scattering based reaction monitoring of in vitro decyclization of creatinine → creatine
Source: Royal Society of Chemistry journal article supplement (doi:10.1039/c6ra03674k), 2016-01-01
Supplement: c6ra03674k1.pdf [file c6ra03674k1.pdf]

## Surface enhanced Raman scattering based reaction monitoring of *in vitro* decyclization of creatinine → creatine

Debraj Gangopadhyay<sup>a,b,†</sup>, Poornima Sharma<sup>a,†</sup>, Sachin Kumar Singh<sup>c,b</sup>, Pushkar Singh<sup>d</sup>, Volker Deckert<sup>b,d</sup>, Jürgen Popp<sup>b,d</sup> and Ranjan K. Singh<sup>a,b\*</sup>

<sup>a</sup>*Department of Physics, Banaras Hindu University, Varanasi-221005, India*

<sup>b</sup>*Institute of Physical Chemistry and Abbe Center of Photonics, Friedrich-Schiller University, Helmholtzweg 4, 07743 Jena, Germany*

<sup>c</sup>*Department of Chemistry, Banaras Hindu University, Varanasi – 221005, India*

<sup>d</sup>*Leibniz Institute of Photonic Technology, Albert-Einstein-Straße 9, 07745 Jena, Germany*

†: main workers with equal contribution

### Supporting Information

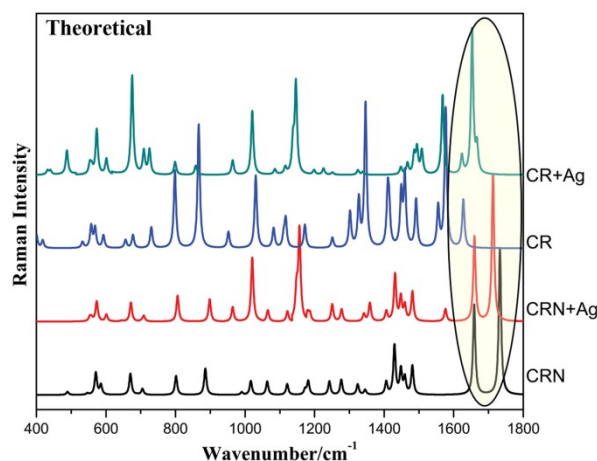

**Fig. S1:** Comparison between the DFT calculated Raman spectra of CRN and CR in aqueous solution and adsorbed on Ag surface. The spectra of CRN and CR show several changes when adsorbed on Ag surface, which show similar trend as observed in the SERS spectra.
